# Supplementary material for: Reconciling electrolyte donicity and polarity for lithium carbon fluoride batteries
Source: Royal Society of Chemistry journal article supplement (doi:10.1039/d4ee01793e), 2024-01-01
Supplement: d4ee01793e1.pdf [file d4ee01793e1.pdf]

Supporting Information for

**Reconciling Electrolyte Donicity and Polarity for Lithium Carbon Fluoride Batteries**

Xingxing Wang,<sup>a</sup> Ziyu Song,<sup>a</sup> Hao Wu,<sup>a</sup> Jiayi Chen,<sup>a</sup> Wenfang Feng,<sup>a</sup> Michel Armand,<sup>b</sup> Zhibin Zhou,<sup>a</sup> \*  
and Heng Zhang<sup>a</sup> \*

---

*a* Key Laboratory of Material Chemistry for Energy Conversion and Storage (Ministry of Education)  
School of Chemistry and Chemical Engineering, Huazhong University of Science and Technology  
1037 Luoyu Road, Wuhan 430074, China

*b* Centre for Cooperative Research on Alternative Energies (CIC energigune), Basque Research and Technology Alliance (BRTA)  
Alava Technology Park, Albert Einstein 48, 01510 Vitoria-Gasteiz, Spain

**Corresponding Authors**

\*Z. Zhou: E-mail: zb-zhou@mail.hust.edu.cn.

\*H. Zhang: E-mail: hengzhang2020@hust.edu.cn.

## Experimental Section

**Materials:** Lithium bis(trifluoromethanesulfonyl)imide (LiTFSI) salt was obtained from Rhodia (purity > 99.8%). The electrolyte solvents including propylene carbonate (PC), 1,2-dimethoxyethane (DME) were received from Aladdin, and were purified using standard procedures before use. <sup>1</sup> The Whatman GF/A separator (18 mm in diameter, 260  $\mu\text{m}$  in thickness), carbon fluoride powders ( $\text{CF}_{0.85}$ , battery grade, Zhong Ke Ceffone) were dried under vacuum (60  $^{\circ}\text{C}$ , 12 h, < 1 mmHg) before use. The conductive carbon (Super P, battery grade) and aluminum foil (16  $\mu\text{m}$  in thickness) were purchased from Shenzhen Kejing, and the polymeric binder PVdF was received from Arkema. The battery-grade metallic lithium disks (14 mm in diameter, 500  $\mu\text{m}$  in thickness) were obtained from China Energy Lithium Co., Ltd. Sodium bis(trifluoromethylsulfonyl)imide (NaTFSI) was synthesized following previous report. <sup>2-4</sup>

**Preparation of the as-resulting electrolytes:** The nonaqueous electrolytes comprising various fractions of DME and PC were prepared in an argon-filled glove box ( $\text{H}_2\text{O}$  < 1 ppm,  $\text{O}_2$  < 1 ppm), following our previous work. <sup>5</sup> The water content of each electrolyte sample was strictly limited to be lower than 30 ppm (Karl-Fischer titration, Metrohm KF 831).

**Preparation of the carbon fluoride cathode:** The carbon fluoride cathode sheet comprising  $\text{CF}_{0.85}$  as active material (85 wt%), super P as conductive carbon (10 wt%), and PVdF as binder (5 wt%) was prepared following previous work. <sup>5</sup> The cathode sheets with an active material loading of 2.0–2.5  $\text{mg cm}^{-2}$  were punched into disks (14 mm in diameter) and were vacuum-dried (100  $^{\circ}\text{C}$ , 12 h) before cell assembly.

**Characterizations of solvents and electrolytes:** The dielectric constant values of the solvent were tested with an electrochemical workstation (Multi Autolab M204, Metrohm) using a cylindrical capacitor cell. <sup>6, 7</sup> The cylindrical capacitor cell was wired in parallel with the variable resistor, and placed in a temperature-controlled box. The impedance was measured from  $10^6$  to  $10^{-1}$  Hz (amplitude voltage: 10 mV). The value of capacitance was obtained by fitting the EIS spectra with a RC multiple circuit. The measured capacitance of the reference solvents is closely associated to the dielectric constant, giving a linear regression equation ( $R^2 = 0.9986$ ) shown in Figure S2.

The Gutmann donor number (DN) of the solvents was determined with the help of  $^{23}\text{Na}$  NMR spectroscopy (Bruker Avance 400, Switzerland), using 0.01 M solution of NaTFSI in different DME/PC solvents. The DN values of various solvents are calculated by Equation (S1), <sup>8</sup>

$$\text{DN} = 2.106 \times \delta + 32.74 \quad \text{Equation (S1)}$$

where  $\delta$  is the chemical shift of  $^{23}\text{Na}$  in NMR spectra.

The polarity of solvents in  $E_T(30)$  scale was determined by UV–vis absorption spectroscopy. Appropriate aliquots of the indicator and solvents were prepared, and the as-formed steady–state solution was transferred into the quartz cuvette (final probe concentrations were ca.  $1 \times 10^{-4}$  mol  $\text{L}^{-1}$ ). UV–vis absorption spectra of the solutions were recorded by using a UV–vis spectrophotometer (UV 2600, Shimadzu).

The measurement of ionic conductivities ( $\sigma$ ) was carried out using a Multi Autolab M204 impedance analyzer. The conductivity cells with two platinized platinum disks (cell constant: ca.  $10 \text{ cm}^{-1}$ ) were prepared in an argon-filled glove box. The testing temperature of the cell was accurately controlled by a JULABO RTH oil bath ( $\pm 0.1$   $^{\circ}\text{C}$ ). Raman spectra of the electrolyte and solvent samples were recorded with a Renishaw in confocal Raman spectrometer (LabRAM HR800; wavelength of incident laser: 532 nm). The samples were hermetically sealed in a nuclear magnetic tube and the spectra were collected in the range spanning from 200 to 2200  $\text{cm}^{-1}$ .

**Cell testing:** The galvanostatic discharge tests of 2032-type coin cells were achieved on a Neware battery testing apparatus in a temperature-controlled room ( $25 \pm 1$   $^{\circ}\text{C}$ ). These as-resulting samples discharged over different current-rates (i.e., 0.05C, 0.1C, 0.5C, 1C, and 2C) with a cut-off voltage at 1.5 V. Before discharge, the cells were left under open circuit voltage (OCV) for 10 h, aiming to avoid interference from the external condition. The galvanostatic intermittent titration technique (GITT) measurement of 2032-type coin cells were performed on a LAND battery cycler (CT2001) at 25  $^{\circ}\text{C}$ . The measurement procedure was set to a pulse current of 0.1C for 30 mins followed by a rest interval for 2.5 h and a cut-off voltage at 1.5 V.

The corresponding  $D_{\text{Li}^+}$  could be calculated through the following Equation (S2) by applying the Fick's second law: <sup>9-11</sup>

$$D_{\text{Li}^+} = \frac{4}{\pi} \left( \frac{I_0 V_M}{Z_i F S} \right) \left( \frac{dE/dx}{dE/d\sqrt{t}} \right)^2 \quad (\tau \ll L^2/D_{\text{Li}^+}) \quad \text{Equation (S2)}$$

Where  $I_0$ ,  $Z_i$  and  $V_M$  is the set current and the charge transfer number in the discharge process, and the molar volume of the  $\text{CF}_x$  cathode material, respectively;  $F$ ,  $S$  and  $L$  is the Faraday constant, the total contact area between the electrode and the electrolyte, and the thickness of the electrode, respectively,  $dE/dx$  is the slope of the coulometric titration curve,  $dE/d\sqrt{t}$  is the transient voltage change during the single titration current flux (after subtracting the IR drop).

**Bulk and surface characterizations of  $\text{CF}_x$  cathode:** The X-ray diffraction (XRD) patterns of the electrodes were recorded on an X-ray diffractometer (Smart Lab-SE, Rigaku Corporation) with  $\text{Cu-K}\alpha$  ( $\lambda = 1.54056 \text{ \AA}$ , incident wavelength) radiation. The XRD patterns were measured in the incident X-ray angles ( $2\theta$ ) ranging from  $5$  to  $80^\circ$  at a scan rate of  $10^\circ \text{ min}^{-1}$ . A field emission scanning electron microscope (FE-SEM, SU8010, Hitachi) technology was performed to observe the morphological micro-structures of the fresh and fully discharged carbon fluoride materials. The elemental composition of fresh  $\text{CF}_{0.85}$  cathodes and cathodes after discharge were analyzed by the EDX and XPS measurements using a photoelectron spectrometer (AXIS-ULTRA DLD-600W, Shimadzu) and the  $\text{Al K}\alpha$  source.

**Table S1** Summarization of solvent parameters such as permittivity, polarity, and donicity with the various fraction of PC content at 25 °C.

| Samples               | Abbreviations                   | Permittivity | Polarity / kcal mol <sup>-1</sup> | Donicity / kcal mol <sup>-1</sup> |
|-----------------------|---------------------------------|--------------|-----------------------------------|-----------------------------------|
| DME                   | D <sub>100</sub> P <sub>0</sub> | 7.5          | 37.9                              | 20.6                              |
| PC/DME (30:70, by wt) | D <sub>70</sub> P <sub>30</sub> | 18.2         | 42.7                              | 18.7                              |
| PC/DME (50:50, by wt) | D <sub>50</sub> P <sub>50</sub> | 31.4         | 44.0                              | 17.7                              |
| PC/DME (70:30, by wt) | D <sub>30</sub> P <sub>70</sub> | 41.4         | 44.7                              | 17.1                              |
| PC                    | D <sub>0</sub> P <sub>100</sub> | 64.0         | 46.0                              | 13.4                              |

**Table S2** Corresponding Cartesian coordinates of the optimized structures for the PC and DMC solvent using DFT calculations.

| Atom | x        | y        | z        | Atom | x        | y        | z          |
|------|----------|----------|----------|------|----------|----------|------------|
| PC   |          |          |          | DMC  |          |          |            |
| O    | -3.50063 | -0.00133 | -0.07594 | C    | -3.07712 | 1.25858  | -0.00998   |
| C    | -2.30651 | 0.63039  | -0.21664 | O    | -1.80019 | 1.91161  | -0.0526    |
| O    | -1.28976 | -0.24412 | -0.02201 | H    | -3.18657 | 0.57759  | -0.85085   |
| C    | -3.28451 | -1.41006 | 0.06317  | H    | -3.81005 | 2.05579  | -0.06806   |
| C    | -1.8041  | -1.50972 | 0.44447  | H    | -3.19073 | 0.70327  | 0.9184     |
| H    | -3.49691 | -1.89517 | -0.89101 | C    | -0.74188 | 1.09858  | -5.7285E-4 |
| H    | -3.95651 | -1.79368 | 0.82564  | O    | 0.36053  | 1.85143  | -0.04036   |
| C    | -1.04359 | -2.65402 | -0.18318 | C    | 1.59882  | 1.12774  | 0.00141    |
| H    | -1.68587 | -1.52112 | 1.52994  | H    | 1.66304  | 0.53171  | 0.90876    |
| H    | -1.44003 | -3.60422 | 0.17656  | H    | 2.37511  | 1.88487  | -0.01271   |
| H    | 0.01045  | -2.60482 | 0.08216  | H    | 1.68812  | 0.47462  | -0.86384   |
| H    | -1.13197 | -2.62804 | -1.26842 | O    | -0.77578 | -0.10249 | 0.07049    |
| O    | -2.17627 | 1.78122  | -0.47374 |      |          |          |            |

The Fritz Haber Institute ab initio molecular simulations (FHI-aims) software was used as a platform for performing the DFT calculations.<sup>12, 13</sup> The Becke's three parameters (B3) exchange functional in combination with the Lee–Yang–Parr (LYP) nonlocal correlation functional (B3LYP)<sup>14</sup> was implemented.<sup>15</sup> For generating initial geometries of the PC and DMC solvent, the open-source molecular visualizer Avogadro was used.<sup>16</sup> Detailed procedures could be accessed in our previous work.<sup>17-19</sup>

**Table S3** Some selected polarity scales defined by the kinetic and spectroscopic measurement, respectively.

| Entry | Polarity scale | Definition                                                                                                                                                                                                                                                                                   | Comments                                                                                                                      | Ref.   |
|-------|----------------|----------------------------------------------------------------------------------------------------------------------------------------------------------------------------------------------------------------------------------------------------------------------------------------------|-------------------------------------------------------------------------------------------------------------------------------|--------|
| 1     | Y              | $Y = \log \frac{k}{k_o} / m$                                                                                                                                                                                                                                                                 | The ionizing power of t-butyl chloride in the given solvent                                                                   | 20-22  |
|       |                | <p><math>k</math> — The rate constant for t-butyl chloride in the given solvent (<math>s^{-1}</math>);</p> <p><math>k_o</math> — The rate constant for t-butyl chloride in the standard solvent (<math>s^{-1}</math>);</p> <p><math>m</math> — A slope characteristic of each substance;</p> |                                                                                                                               |        |
| 2     | $\Omega$       | $\Omega = \log \frac{k_N}{k_X} = \log \frac{N}{X}$                                                                                                                                                                                                                                           | The product of the specific rate constants for forming endo-product ( $k_N$ ), against that for forming exo-product ( $k_X$ ) | 23     |
|       |                | <p><math>k_N</math> — The rate constants for forming endo-product (<math>s^{-1}</math>);</p> <p><math>k_X</math> — The rate constants for forming exo-product (<math>s^{-1}</math>);</p> <p><math>Z = E_T = 2.859 \cdot 10^{-3} \cdot \nu</math></p>                                         |                                                                                                                               |        |
| 3     | Z              | $E_T$ — The molar transition energies ( $\text{kcal} \cdot \text{mol}^{-1}$ );                                                                                                                                                                                                               | The molar transition energies of 1-ethyl-4-methoxycarbonylpyridinium iodide                                                   | 24     |
|       |                | $\nu$ — The position of the absorption maximum ( $\text{cm}^{-1}$ );                                                                                                                                                                                                                         |                                                                                                                               |        |
| 4     | $E_T(30)$      | $E_T(30) = 28591 / \lambda_{max}$                                                                                                                                                                                                                                                            | The molar electronic transition energy (historically in $\text{kcal} \cdot \text{mol}^{-1}$ ) of the Reichardt dye 30         | 25, 26 |
|       |                | $\lambda_{max}$ — The maximum wavelength of the absorption band in the ultraviolet-visible (UV-vis) region (nm);                                                                                                                                                                             |                                                                                                                               |        |

**Table S4** Molar absorption coefficient of these involved solvent samples, calculated by the Beer-Lamber law.

| Sample                   | A <sup>a)</sup> | b <sup>b)</sup> / cm | c <sup>c)</sup> / mol L <sup>-1</sup> | k <sup>d)</sup> / L cm <sup>-1</sup> mol <sup>-1</sup> |
|--------------------------|-----------------|----------------------|---------------------------------------|--------------------------------------------------------|
| DME-dye 30               | 0.625           | 1                    | 1 × 10 <sup>-4</sup>                  | 6.25 × 10 <sup>3</sup>                                 |
| DME/PC (7:3, w/w)-dye 30 | 0.654           | 1                    | 1 × 10 <sup>-4</sup>                  | 6.54 × 10 <sup>3</sup>                                 |
| DME/PC (5:5, w/w)-dye 30 | 0.411           | 1                    | 1 × 10 <sup>-4</sup>                  | 4.11 × 10 <sup>3</sup>                                 |
| DME/PC (3:7, w/w)-dye 30 | 0.372           | 1                    | 1 × 10 <sup>-4</sup>                  | 3.72 × 10 <sup>3</sup>                                 |
| PC-dye 30                | 0.481           | 1                    | 1 × 10 <sup>-4</sup>                  | 4.81 × 10 <sup>3</sup>                                 |

a) Absorbance of the sample; b) Thickness of cuvette; c) Solution concentration; d) Molar absorption coefficient of the sample.

**Table S5** Summarization of the specific capacity, voltage plateau and energy density of all the samples on the discharged CF<sub>x</sub> cathode by XPS technology at 0.1C.

| Samples                      | Abbreviations                   | Specific capacity<br>/ mAh g <sup>-1</sup> | Voltage plateau<br>/ V | Energy density<br>/ Wh kg <sup>-1</sup> |
|------------------------------|---------------------------------|--------------------------------------------|------------------------|-----------------------------------------|
| LiTFSI-DME                   | D <sub>100</sub> P <sub>0</sub> | 649.2                                      | 2.92                   | 1754.4                                  |
| LiTFSI-PC/DME (30:70, by wt) | D <sub>70</sub> P <sub>30</sub> | 678.2                                      | 2.93                   | 1843.7                                  |
| LiTFSI-PC/DME (50:50, by wt) | D <sub>50</sub> P <sub>50</sub> | 636.2                                      | 2.86                   | 1700.6                                  |
| LiTFSI-PC/DME (70:30, by wt) | D <sub>30</sub> P <sub>70</sub> | 578.1                                      | 2.83                   | 1531.4                                  |
| LiTFSI-PC                    | D <sub>0</sub> P <sub>100</sub> | 202.3                                      | 2.58                   | 494.3                                   |



**Table S6** Atomic percentage for the elements detected on the discharged CF<sub>x</sub> cathode by EDX technology.

| Samples                         | C / at.% | N / at.% | O / at.% | F / at.% | S / at.% |
|---------------------------------|----------|----------|----------|----------|----------|
| Fresh CF <sub>0.85</sub>        | 72.94    |          |          | 27.06    |          |
| D <sub>100</sub> P <sub>0</sub> | 57.36    | 1.72     | 4.53     | 36.01    | 0.39     |
| D <sub>70</sub> P <sub>30</sub> | 53.95    | 0.00     | 8.32     | 36.96    | 0.76     |
| D <sub>50</sub> P <sub>50</sub> | 57.66    | 2.04     | 7.80     | 32.23    | 0.26     |
| D <sub>30</sub> P <sub>70</sub> | 58.68    | 0.00     | 2.89     | 38.24    | 0.19     |
| D <sub>0</sub> P <sub>100</sub> | 65.83    | 0.00     | 2.57     | 31.42    | 0.18     |

**Table S7** Atomic percentage for the elements detected on the discharged CF<sub>x</sub> cathode by XPS technology.

| Samples                         | C / at.% | O / at.% | F / at.% | Li / at.% | S / at.% | N / at.% |
|---------------------------------|----------|----------|----------|-----------|----------|----------|
| D <sub>100</sub> P <sub>0</sub> | 21.8     | 26.3     | 31.7     | 18.4      | 1.1      | 0.8      |
| D <sub>70</sub> P <sub>30</sub> | 41.7     | 24.4     | 14.1     | 18.6      | 0.5      | 0.6      |
| D <sub>50</sub> P <sub>50</sub> | 32.9     | 22.1     | 28.8     | 15.5      | 0.1      | 0.6      |
| D <sub>30</sub> P <sub>70</sub> | 27.6     | 30.1     | 28.1     | 13.5      | 0.2      | 0.6      |
| D <sub>0</sub> P <sub>100</sub> | 30.2     | 25.5     | 26.2     | 14.5      | 3.2      | 0.7      |

**Table S8** Summarization of the deconvoluted peak positions and area in the region of 675–775 and 775–900  $\text{cm}^{-1}$  in the Raman spectroscopy for the various electrolytes at 25 °C.

| Samples                         | Peak position / $\text{cm}^{-1}$    | Peak area | Ref.                   |
|---------------------------------|-------------------------------------|-----------|------------------------|
| D <sub>100</sub> P <sub>0</sub> | 739 (Free TFSI <sup>-</sup> )       | 30264     | 27, 28                 |
|                                 | 821 (Free DME)                      | 12928     |                        |
|                                 | 847 (Free DME)                      | 25319     |                        |
|                                 | 872 (Solvated Li <sup>+</sup> -DME) | 17558     |                        |
| D <sub>70</sub> P <sub>30</sub> | 709 (Free PC)                       | 11201     | 29-38                  |
|                                 | 727 (Solvated Li <sup>+</sup> -PC)  | 1554      |                        |
|                                 | 739 (Free TFSI <sup>-</sup> )       | 24558     |                        |
|                                 | 823 (Free DME)                      | 6299      |                        |
|                                 | 847 (Free DME and PC)               | 34696     |                        |
|                                 | 872 (Solvated Li <sup>+</sup> -DME) | 12383     |                        |
| D <sub>50</sub> P <sub>50</sub> | 709 (Free PC)                       | 20308     | 29-38                  |
|                                 | 727 (Solvated Li <sup>+</sup> -PC)  | 2389      |                        |
|                                 | 739 (Free TFSI <sup>-</sup> )       | 27402     |                        |
|                                 | 825 (Free DME)                      | 5047      |                        |
|                                 | 847 (Free DME and PC)               | 47701     |                        |
|                                 | 872 (Solvated Li <sup>+</sup> -DME) | 12517     |                        |
| D <sub>30</sub> P <sub>70</sub> | 709 (Free PC)                       | 26124     | 29-38                  |
|                                 | 726 (Solvated Li <sup>+</sup> -PC)  | 2407      |                        |
|                                 | 739 (Free TFSI <sup>-</sup> )       | 25628     |                        |
|                                 | 826 (Free DME)                      | 2168      |                        |
|                                 | 847 (Free DME and PC)               | 52421     |                        |
|                                 | 872 (Solvated Li <sup>+</sup> -DME) | 7830      |                        |
| D <sub>0</sub> P <sub>100</sub> | 709 (Free PC)                       | 33111     | 29, 30, 32, 36, 37, 39 |
|                                 | 726 (Solvated Li <sup>+</sup> -PC)  | 4554      |                        |
|                                 | 739 (Free TFSI <sup>-</sup> )       | 21438     |                        |
|                                 | 847 (Free PC)                       | 59572     |                        |

**Table S9** Summary of various parameters and reaction mechanism for conversion-type electrode materials.

| Classification | Materials                                        | Theoretical capacity / mAh g <sup>-1</sup> | Work potential / V | Reaction mechanism                                                                                            | Ref.   |
|----------------|--------------------------------------------------|--------------------------------------------|--------------------|---------------------------------------------------------------------------------------------------------------|--------|
| Oxides         | CuO                                              | 670                                        | 0 – 3              | $\text{CuO} + 2\text{Li} \leftrightarrow \text{Cu} + \text{Li}_2\text{O}$                                     | 40, 41 |
|                | NiO                                              | 718                                        | 0.005 – 3          | $\text{NiO} + 2\text{Li} \leftrightarrow \text{Ni} + \text{Li}_2\text{O}$                                     | 41     |
|                | Fe <sub>2</sub> O <sub>3</sub>                   | 1005                                       | 0.01 – 3           | $\text{Fe}_2\text{O}_3 + 6\text{Li} \leftrightarrow 2\text{Fe} + 3\text{Li}_2\text{O}$                        | 42     |
|                | Fe <sub>3</sub> O <sub>4</sub>                   | 926                                        | 0 – 3              | $\text{Fe}_3\text{O}_4 + 8\text{Li} \leftrightarrow 3\text{Fe} + 4\text{Li}_2\text{O}$                        | 43     |
|                | MnO <sub>2</sub> ,                               | 1230                                       | 0.35               | $\text{MnO}_2 + 4\text{Li} \leftrightarrow \text{Mn} + 2\text{Li}_2\text{O}$                                  | 44     |
|                | MnFe <sub>2</sub> O <sub>4</sub> ,               | 765                                        | 0.8                | $\text{MnFe}_2\text{O}_4 + 8\text{Li} \leftrightarrow \text{Mn} + 2\text{Fe} + 4\text{Li}_2\text{O}$          | 45     |
|                | SnO <sub>2</sub> ,                               | 1493                                       | 1.0                | $\text{SnO}_2 + 4\text{Li} \leftrightarrow \text{Sn} + 2\text{Li}_2\text{O}$                                  | 46     |
|                | ZnO                                              | 988                                        | 0.7                | $\text{ZnO} + 2\text{Li} \leftrightarrow \text{Zn} + \text{Li}_2\text{O}$                                     | 47     |
| Chalcogenides  | S                                                | 1675                                       | 2.2                | $\text{S}_8 + 16\text{Li} \leftrightarrow 8\text{Li}_2\text{S}$                                               | 48     |
|                | CoS <sub>2</sub>                                 | 870                                        |                    | $\text{CoS}_2 + 4\text{Li} \leftrightarrow \text{Co} + 2\text{Li}_2\text{S}$                                  | 49     |
|                | FeS <sub>2</sub>                                 | 894                                        | 1.87               | $\text{FeS}_2 + 4\text{Li} \leftrightarrow \text{Fe} + 2\text{Li}_2\text{S}$                                  | 50     |
|                | Cu <sub>2</sub> S                                | 335                                        | 0.5                | $\text{Cu}_2\text{S} + 2\text{Li} \leftrightarrow 2\text{Cu} + \text{Li}_2\text{S}$                           | 51     |
|                | TiS <sub>2</sub>                                 | 239                                        |                    | $\text{TiS}_2 + 4\text{Li} \leftrightarrow \text{Ti} + 2\text{Li}_2\text{S}$                                  | 52     |
|                | SnS <sub>2</sub>                                 | 1231                                       |                    | $\text{SnS}_2 + 4\text{Li} \leftrightarrow \text{Sn} + 2\text{Li}_2\text{S}$                                  | 53, 54 |
|                | Sb <sub>2</sub> Se <sub>3</sub>                  | 670                                        | 0.86               | $\text{Sb}_2\text{Se}_3 + 12\text{Na} \leftrightarrow 2\text{Na}_3\text{Sb} + 3\text{Na}_2\text{Se}$          | 55     |
| Fluorides      | FeF <sub>3</sub>                                 | 712                                        | 2.7                | $\text{FeF}_3 + 3\text{Li} \leftrightarrow \text{Fe} + 3\text{LiF}$                                           | 56     |
|                | NiF <sub>2</sub>                                 | 320                                        | 1.3                | $\text{NiF}_2 + 3\text{Li} \leftrightarrow \text{Ni} + 2\text{LiF}$                                           | 57     |
|                | Cu <sub>y</sub> Fe <sub>1-y</sub> F <sub>2</sub> | 549                                        | 2.8, 3.4, 3.8      | $\text{Cu}_y\text{Fe}_{1-y}\text{F}_2 + 2\text{Li} \leftrightarrow y\text{Cu} + (1-y)\text{Fe} + 2\text{LiF}$ | 58     |
| Phosphides     | Ni <sub>2</sub> P                                | 2596                                       |                    | $\text{Ni}_2\text{P} + 3\text{Na} \leftrightarrow 2\text{Ni} + \text{Na}_3\text{P}$                           | 59, 60 |
| Silicates      | Co <sub>2</sub> SiO <sub>4</sub>                 |                                            | 1.6                |                                                                                                               | 61     |

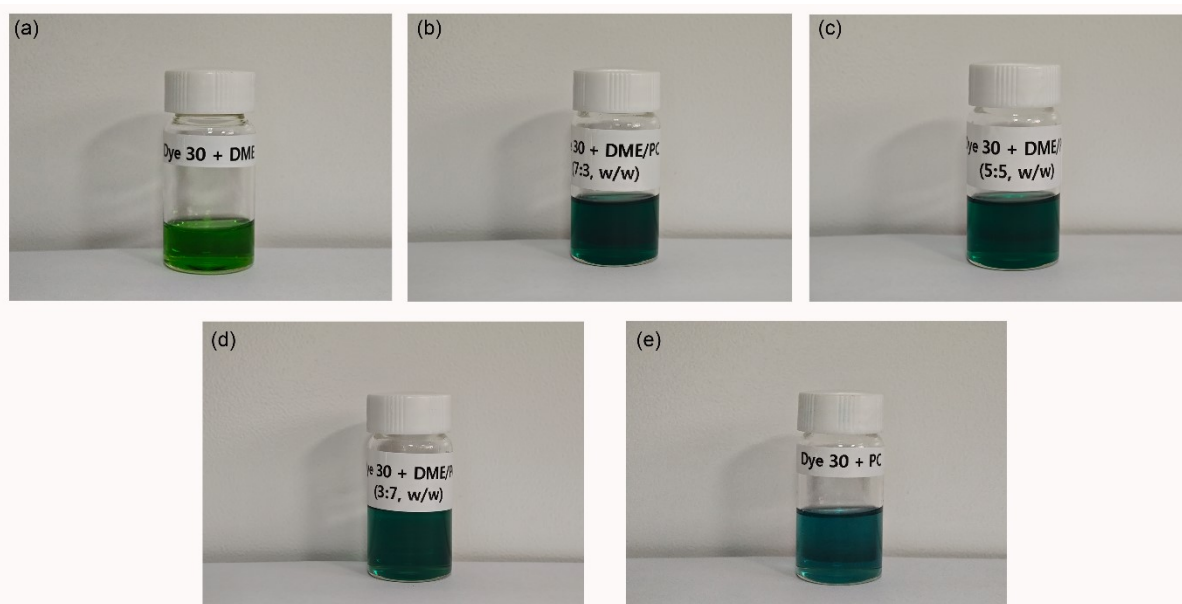

**Fig. S1.** Appearance photos of different solvent after adding dye 30: (a) dye 30 + DME, (b) dye 30 + DME/PC (7:3, by wt.), (c) dye 30 + DME/PC (5:5, by wt.), (d) dye 30 + DME/PC (3:7, by wt.), (e) dye 30 + PC.

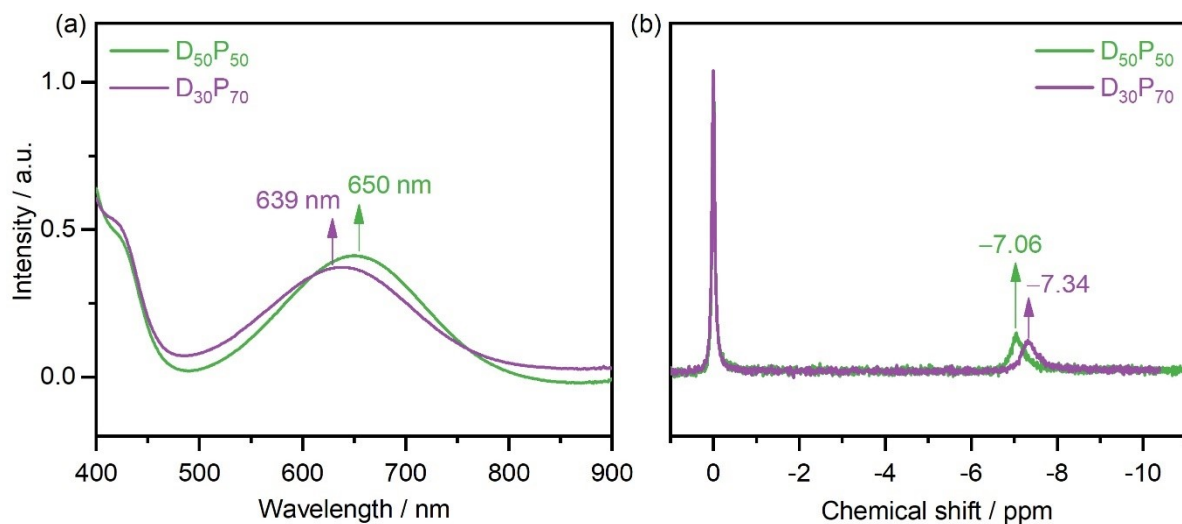

**Fig. S2** (a) UV-vis absorption spectra of the different DME/PC mixed electrolytes (i.e.,  $D_{50}P_{50}$  and  $D_{30}P_{70}$ ) in the range of 400–900 nm. (b)  $^{23}\text{Na}$ -NMR spectra of the different DME/PC mixed electrolytes (i.e.,  $D_{50}P_{50}$  and  $D_{30}P_{70}$ ) with NaTFSI.

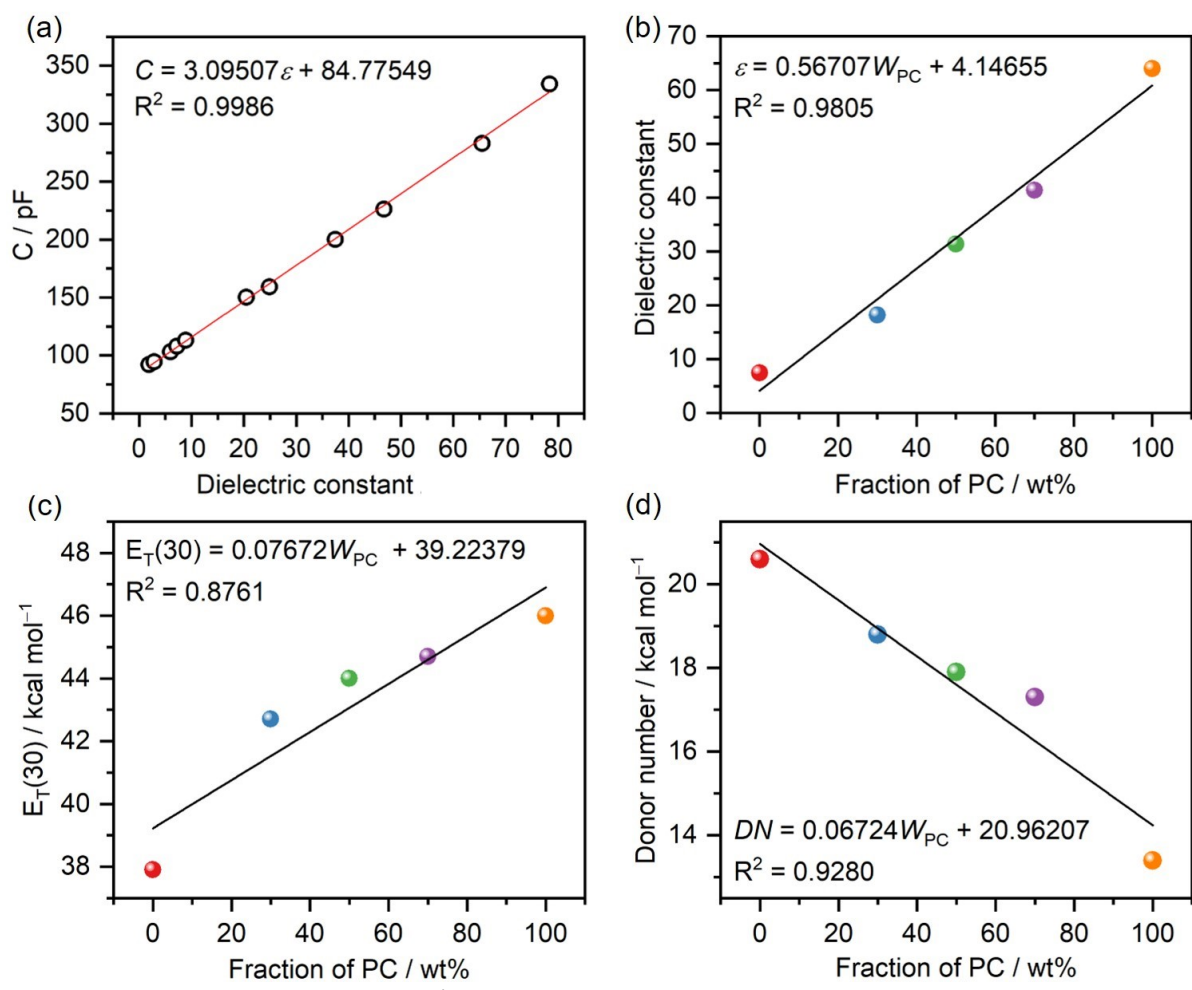

**Fig. S3** (a) Dielectric constant of the DME/PC mixed solvents measured by the method suggested by Dahn et al.<sup>7</sup> The dielectric constants of the used reference solvents are given below: 1.9 (*n*-hexane), 2.9 (ethyl methyl carbonate), 6.0 (ethyl acetate), 7.2 (1,2-dimethoxyethane), 8.9 (dichloromethane), 20.5 (acetone), 24.9 (ethanol), 37.5 (acetonitrile), 46.8 (dimethyl sulfoxide), 65.5 (propylene carbonate), and 78.4 (water).<sup>62-64</sup> The fitting curves and equations of the solvent parameters for five kinds of PC/DME mixtures: (b) dielectric constant; (c)  $E_{\text{T}}(30)$  value; (d) Donor number value.

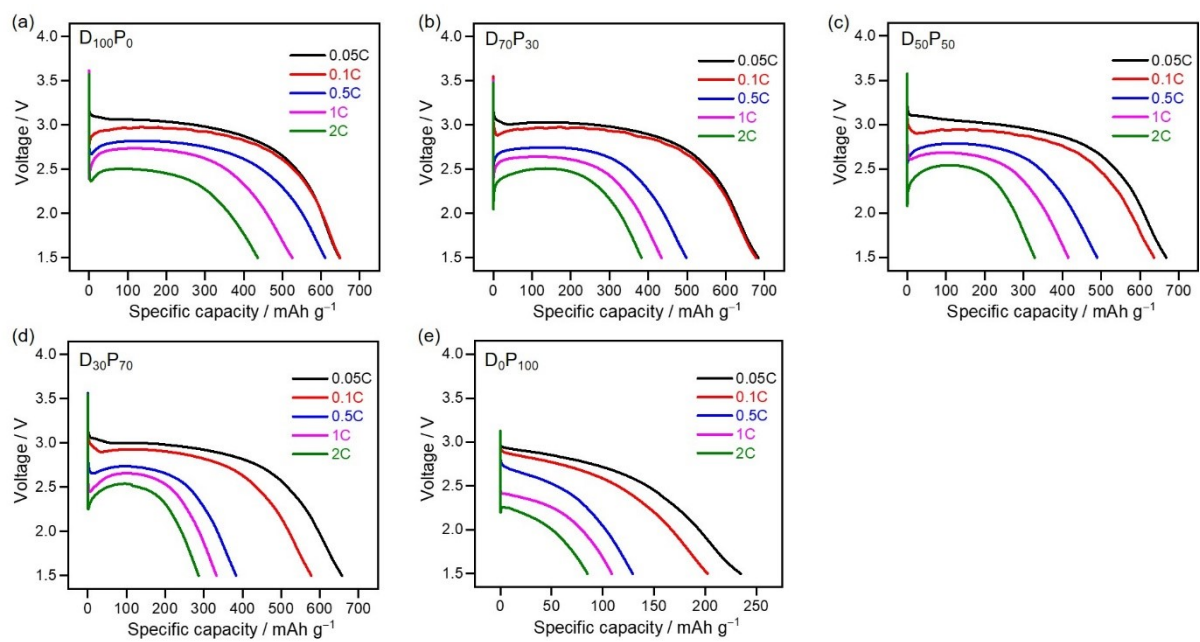

**Fig. S4.** Dependence of discharged capacities vs. current-rates for the  $\text{Li}^+ \parallel \text{CF}_x$  cells with different electrolytes, (a)  $\text{D}_{100}\text{P}_0$ , (b)  $\text{D}_{70}\text{P}_{30}$ , (c)  $\text{D}_{50}\text{P}_{50}$ , (d)  $\text{D}_{30}\text{P}_{70}$ , and (e)  $\text{D}_0\text{P}_{100}$ .



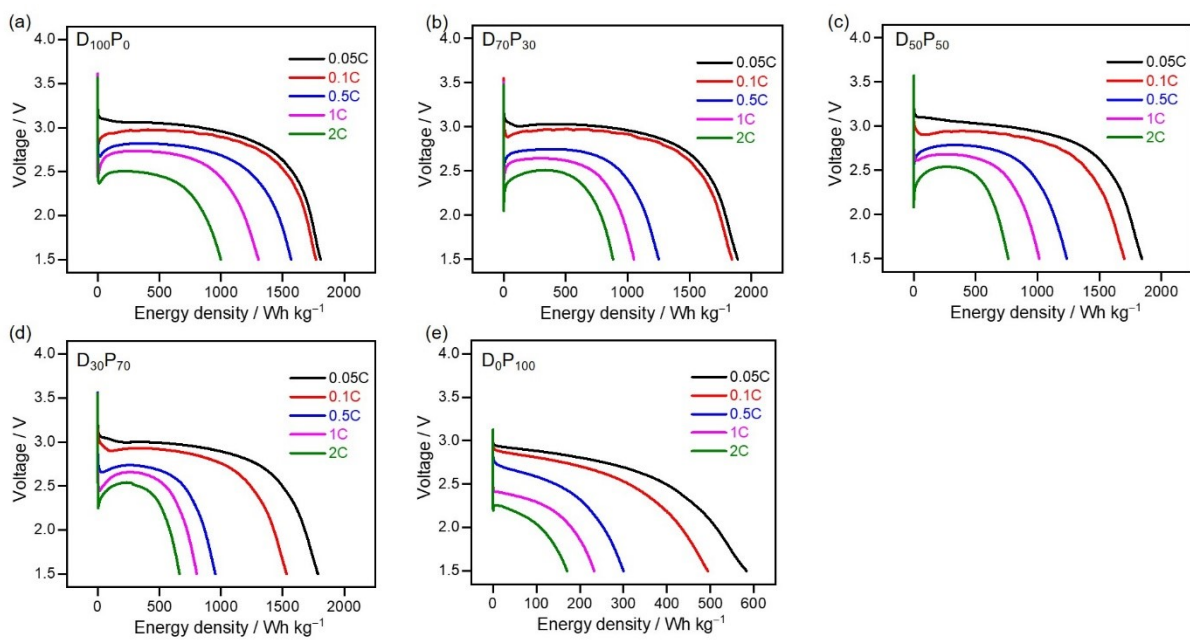

**Fig. S5** Dependence of energy density vs. current-rates for the Li<sup>+</sup> | |CF<sub>x</sub> cells with different electrolytes, (a) D<sub>100</sub>P<sub>0</sub>, (b) D<sub>70</sub>P<sub>30</sub>, (c) D<sub>50</sub>P<sub>50</sub>, (d) D<sub>30</sub>P<sub>70</sub>, and (e) D<sub>0</sub>P<sub>100</sub>.

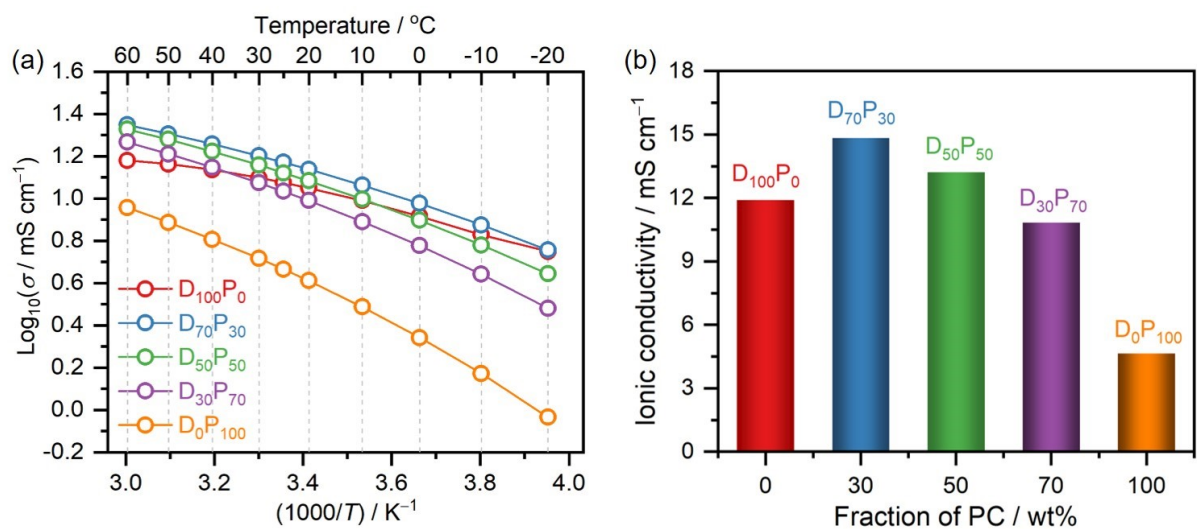

**Fig. S6** (a) Temperature dependence of ionic conductivities for various kinds of electrolytes. (b) Ionic conductivities of the electrolytes at 25 °C.

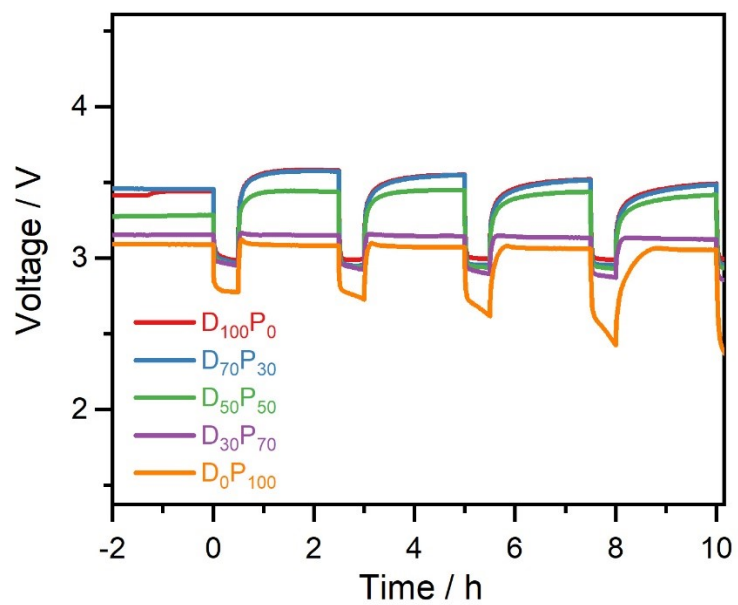

**Fig. S7** Zoomed-in profiles of the  $\text{Li}^+|\text{CF}_x$  cells with different electrolytes at a relatively low discharge rate of 0.1C.

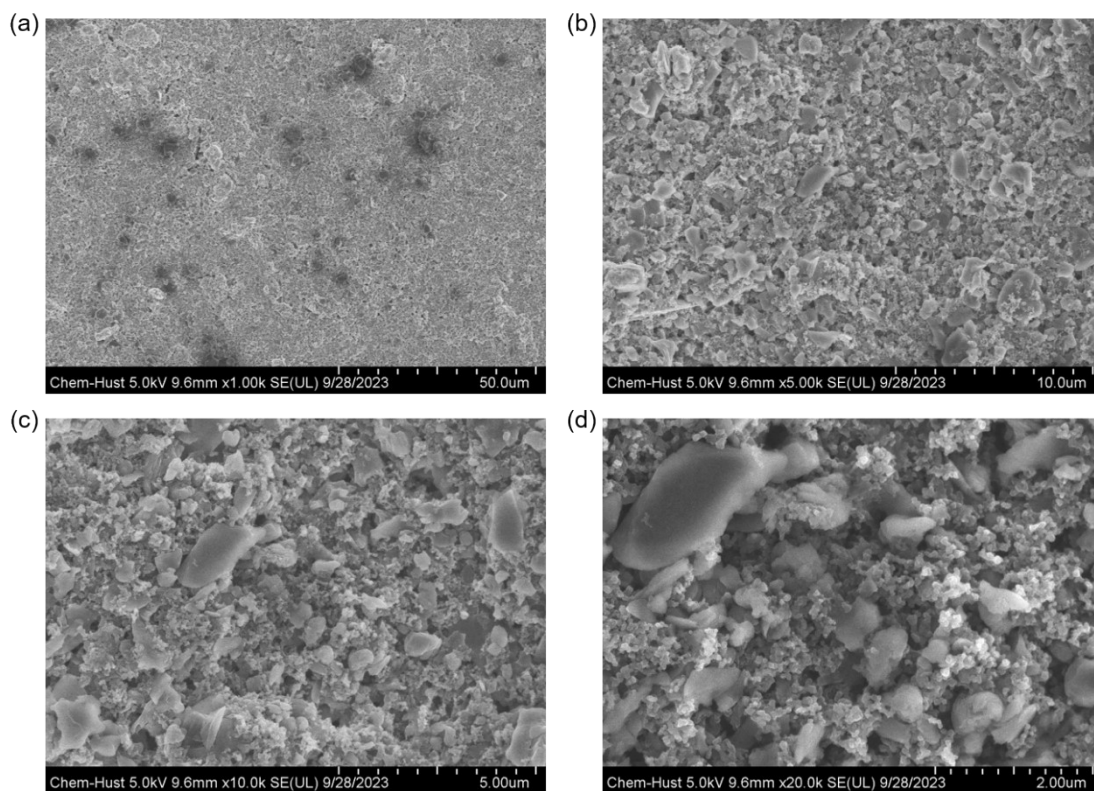

**Fig. S8** SEM images of the fresh  $CF_x$  cathode at various magnification scale. (a)  $\times 1000$ , (b)  $\times 5000$ , (c)  $\times 10000$ , (d)  $\times 20000$ .

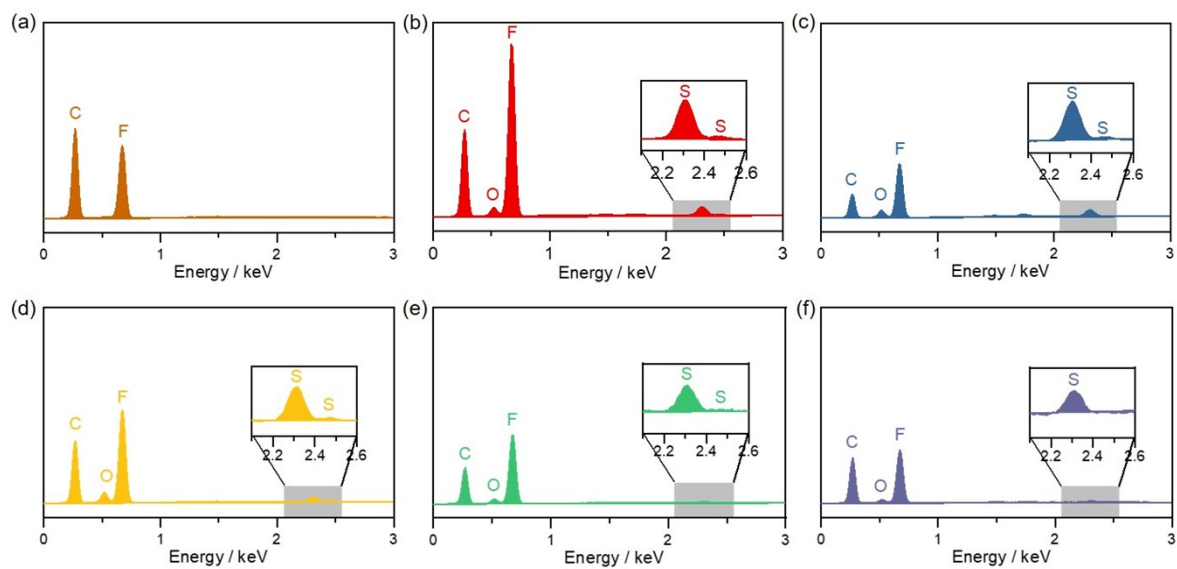

**Fig. S9** Energy-dispersive X-ray spectra of pristine fluorinated carbon (a) and the electrodes after discharge at 0.1C with various kinds of electrolytes (b-f). (b) D<sub>100</sub>P<sub>0</sub>, (c) D<sub>70</sub>P<sub>30</sub>, (d) D<sub>50</sub>P<sub>50</sub>, (e) D<sub>30</sub>P<sub>70</sub>, and (f) D<sub>0</sub>P<sub>100</sub>.

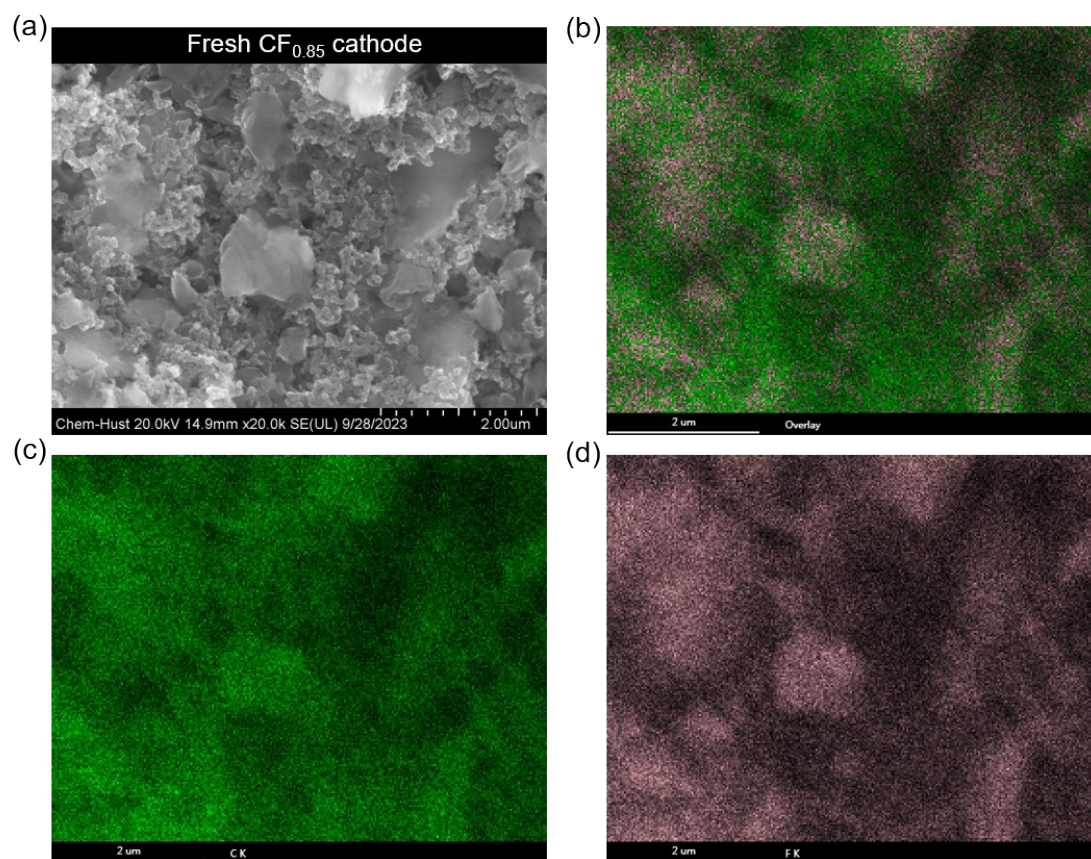

**Fig. S10** EDX images of the fresh  $CF_x$  cathodes: (a) region selected for mapping analyses, (b) overlay of element C and F signals, (c) element C signal, and (d) element F signal.

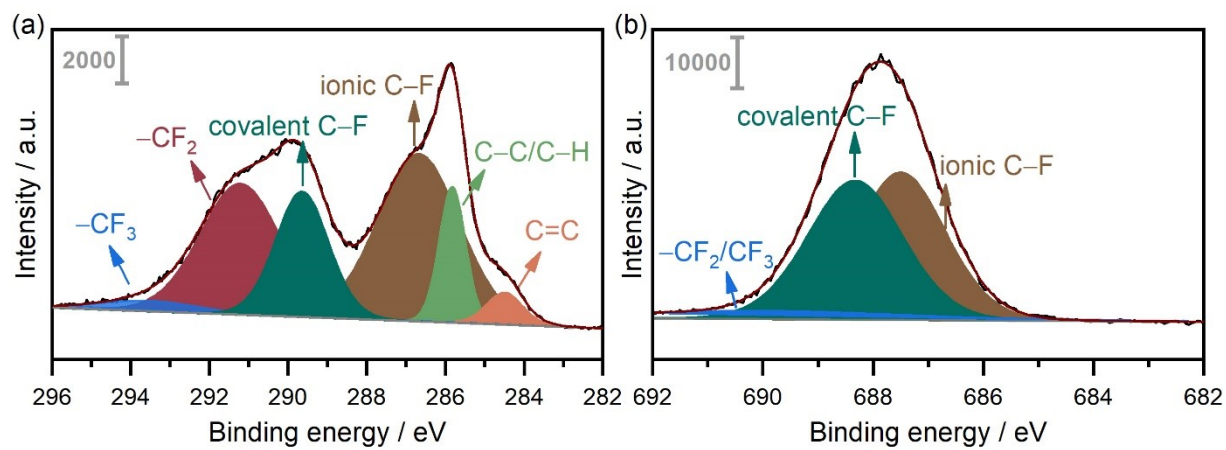

**Fig. S11** (a) C 1s and (b) F 1s XPS spectra of the fresh  $\text{CF}_x$  cathode.

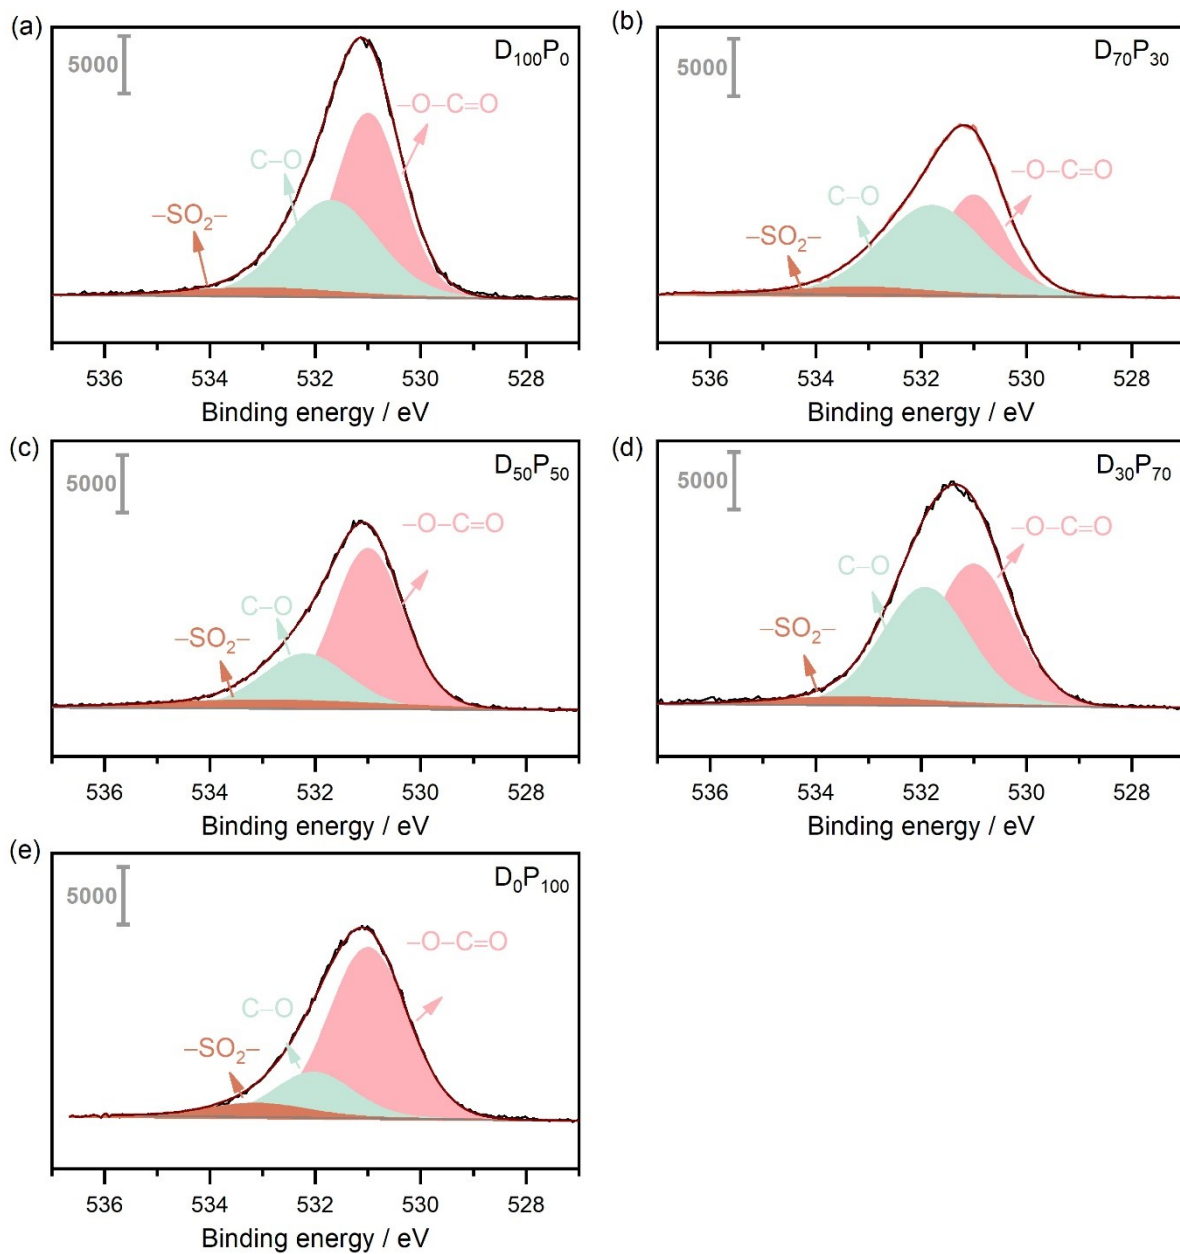

**Fig. S12** O 1s XPS spectra for the  $CF_x$  cathodes after discharge at 0.1C in various kinds of electrolytes: (a)  $D_{100}P_0$ , (b)  $D_{70}P_{30}$ , (c)  $D_{50}P_{50}$ , (d)  $D_{30}P_{70}$ , and (e)  $D_0P_{100}$ .



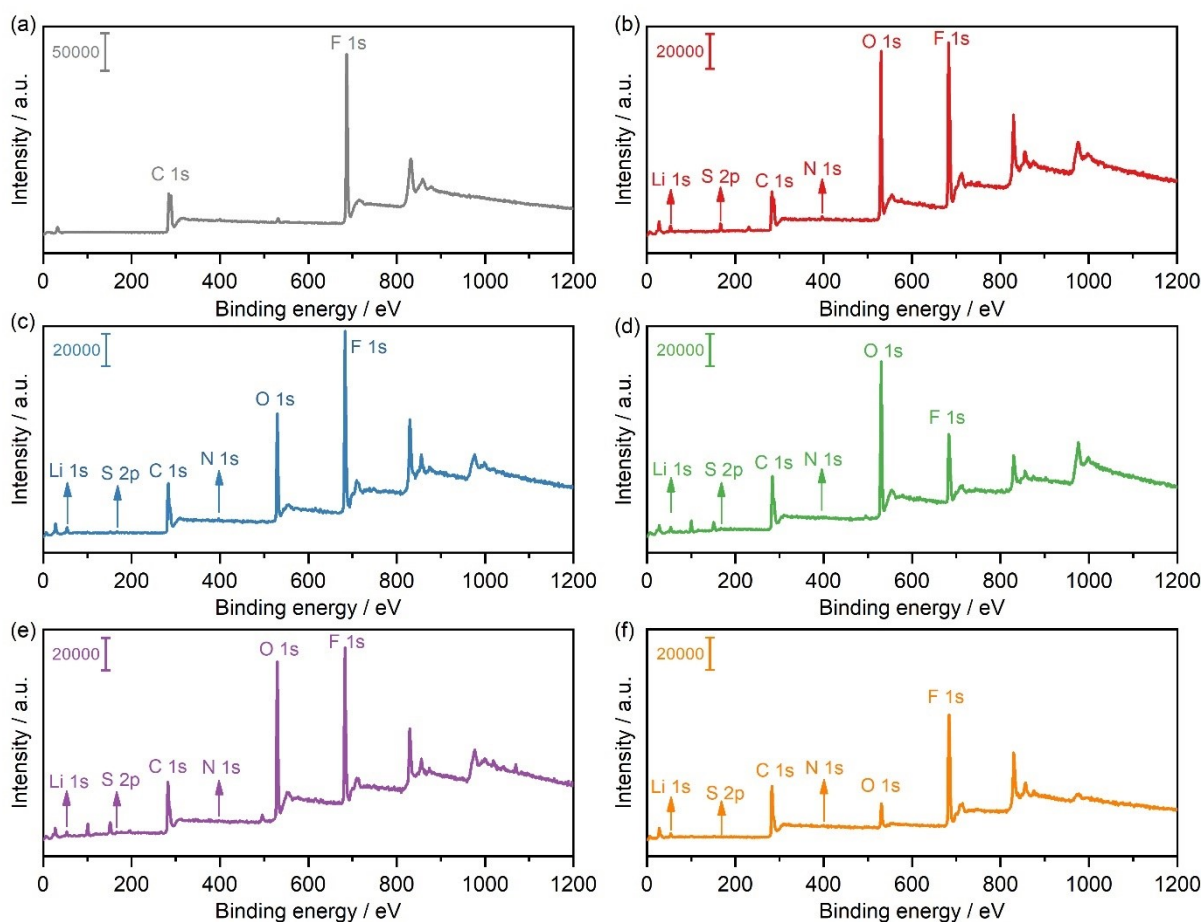

**Fig. S13** XPS survey spectra for pristine fluorinated carbon (a) and the electrodes after discharge at 0.1C with various kinds of electrolytes (b-f). (b) D<sub>100</sub>P<sub>0</sub>, (c) D<sub>70</sub>P<sub>30</sub>, (d) D<sub>50</sub>P<sub>50</sub>, (e) D<sub>30</sub>P<sub>70</sub>, and (f) D<sub>0</sub>P<sub>100</sub>.

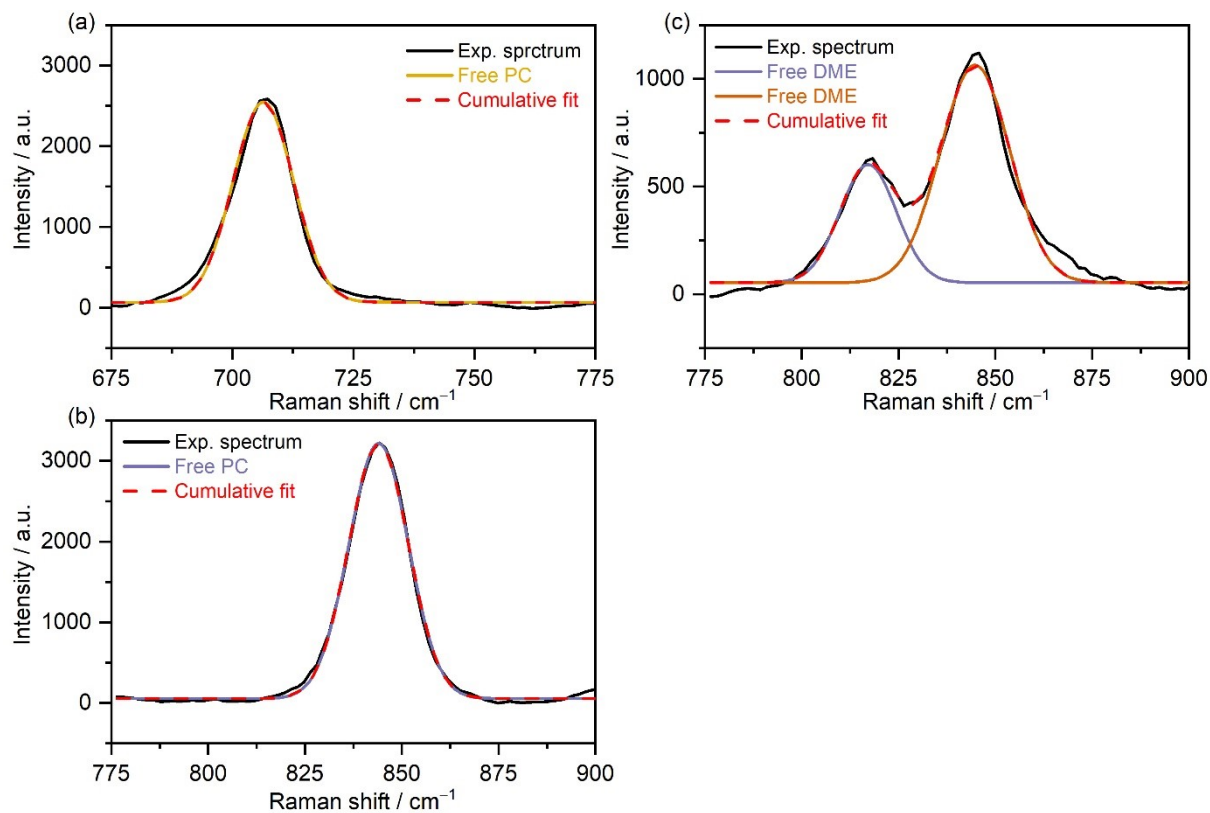

**Fig. S14** Local Raman spectra and solution composition diagram of the neat PC and DME: (a) neat PC in the region 675–775  $\text{cm}^{-1}$ ; (b) neat PC in the region 775–900  $\text{cm}^{-1}$ ; (c) neat DME in the region 775–900  $\text{cm}^{-1}$ .

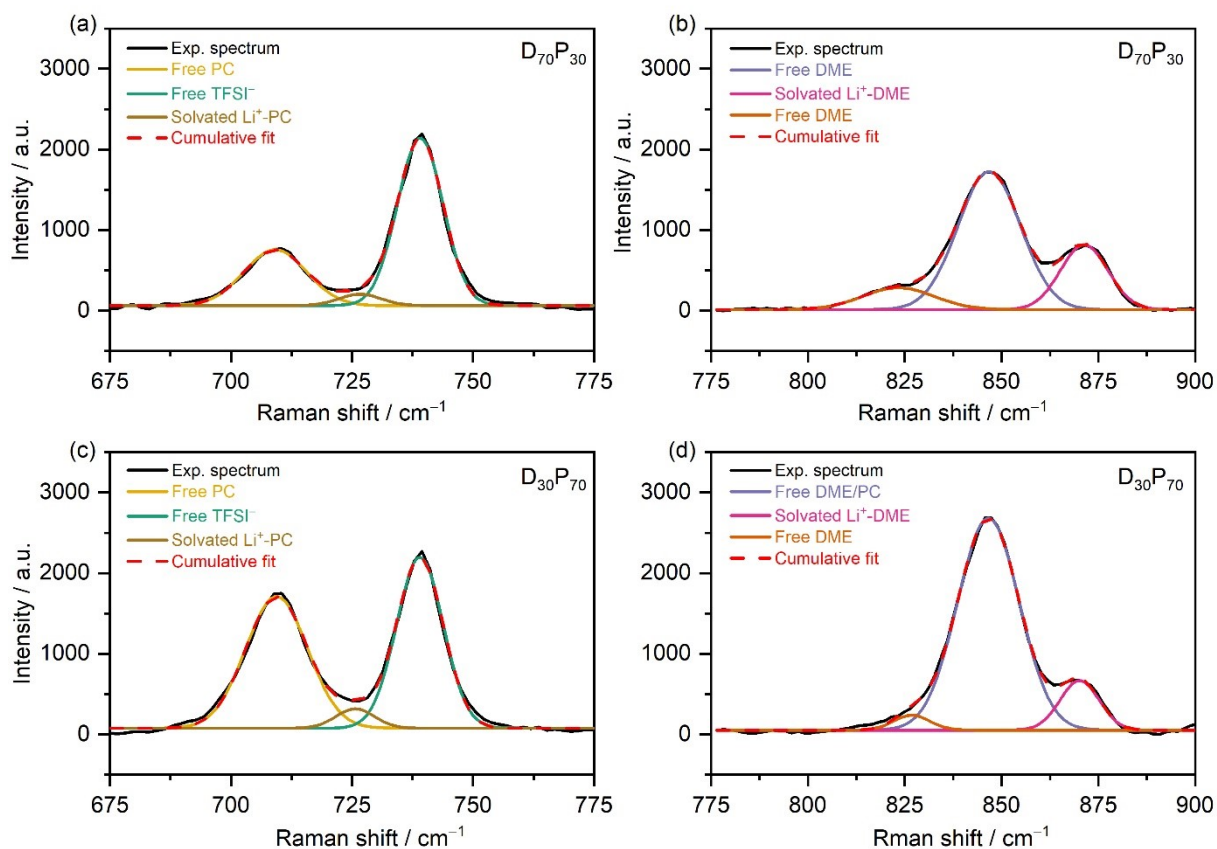

**Fig. S15** Local Raman spectra and solution composition diagram of the selected electrolytes: (a)  $\text{D}_{70}\text{P}_{30}$  electrolyte in the region 675–775  $\text{cm}^{-1}$ ; (b)  $\text{D}_{70}\text{P}_{30}$  electrolyte in the region 775–900  $\text{cm}^{-1}$ ; (c)  $\text{D}_{30}\text{P}_{70}$  electrolyte in the region 675–775  $\text{cm}^{-1}$ ; (d)  $\text{D}_{30}\text{P}_{70}$  electrolyte in the region 775–900  $\text{cm}^{-1}$ .

## References

1. I. Smallwood, *Handbook of organic solvent properties*, Butterworth-Heinemann, **2012**.
2. H. Zhang, C. Li, M. Piszcz, E. Coya, T. Rojo, L. M. Rodriguez-Martinez, M. Armand and Z. Zhou, *Chem. Soc. Rev.*, **2017**, **46**, 797–815.
3. H. Zhang, U. Oteo, H. Zhu, X. Judez, M. Martinez-Ibañez, I. Aldalur, E. Sanchez-Diez, C. Li, J. Carrasco, M. Forsyth and M. Armand, *Angew. Chem., Int. Ed.*, **2019**, **58**, 7829–7834.
4. L. Qiao, U. Oteo, M. Martinez-Ibanez, A. Santiago, R. Cid, E. Sanchez-Diez, E. Lobato, L. Meabe, M. Armand and H. Zhang, *Nat. Mater.*, **2022**, **21**, 455–462.
5. X. Wang, Z. Song, H. Wu, H. Yu, W. Feng, M. Armand, X. Huang, Z. Zhou and H. Zhang, *Angew. Chem., Int. Ed.*, **2022**, **61**, e202211623.
6. H. Wu, Z. Song, W. Feng, Z. Zhou and H. Zhang, *Nano Res.*, **2023**, **16**, 9507–9518.
7. D. S. Hall, J. Self and J. R. Dahn, *J. Phys. Chem. C*, **2015**, **119**, 22322–22330.
8. M. Schmeisser, P. Illner, R. Puchta, A. Zahl and R. van Eldik, *Chemistry*, **2012**, **18**, 10969–10982.
9. W. Weppner and R. A. Huggins, *J. Electrochem. Soc.*, **1977**, **124**, 1569–1578.
10. L. Li, R. Jacobs, P. Gao, L. Gan, F. Wang, D. Morgan and S. Jin, *J. Am. Chem. Soc.*, **2016**, **138**, 2838–2848.
11. Y. Xiao, J. Jian, A. Fu, C. Tang, Y. Zou, X. Chen, J. Wang, Y. Yang and J. Zheng, *ACS Sustainable Chem. Eng.*, **2022**, **10**, 6217–6229.
12. V. Blum, R. Gehrke, F. Hanke, P. Havu, V. Havu, X. Ren, K. Reuter and M. Scheffler, *Comput. Phys. Commun.*, **2009**, **180**, 2175–2196.
13. V. Havu, V. Blum, P. Havu and M. Scheffler, *J. Comput. Phys.*, **2009**, **228**, 8367–8379.
14. C. Lee, W. Yang and R. G. Parr, *Phys. Rev. B*, **1988**, **37**, 785–789.
15. A. D. Becke, *J. Chem. Phys.*, **1992**, **96**, 2155–2160.
16. M. D. Hanwell, D. E. Curtis, D. C. Lonie, T. Vandermeersch, E. Zurek and G. R. Hutchison, *J. Cheminform.*, **2012**, **4**, 1–17.
17. H. Zhang, O. Arcelus and J. Carrasco, *Electrochim. Acta*, **2018**, **280**, 290–299.
18. M. Martinez-Ibañez, E. Sanchez-Diez, L. Qiao, Y. Zhang, X. Judez, A. Santiago, I. Aldalur, J. Carrasco, H. Zhu, M. Forsyth, M. Armand and H. Zhang, *Adv. Funct. Mater.*, **2020**, **30**, 2000455.
19. X. Wang, Z. Song, H. Wu, J. Nie, W. Feng, H. Yu, X. Huang, M. Armand, Z. Zhou and H. Zhang, *ChemElectroChem*, **2022**, **9**, e202101590.
20. E. Grunwald and S. Winstein, *J. Am. Chem. Soc.*, **1948**, **70**, 846–854.
21. S. Winstein, E. Grunwald and H. W. Jones, *J. Am. Chem. Soc.*, **1951**, **73**, 2700–2707.
22. A. H. Fainberg and S. Winstein, *J. Am. Chem. Soc.*, **1957**, **79**, 1597–1602.
23. J. A. Berson, Z. Hamlet and W. A. Mueller, *J. Am. Chem. Soc.*, **1962**, **84**, 297–304.
24. E. M. Kosower, *J. Am. Chem. Soc.*, **1958**, **80**, 3253–3260.
25. K. Dimroth, C. Reichardt, T. Siepmann and F. Bohlmann, *Justus Liebigs Ann. Chem.*, **1963**, **661**, 1–37.
26. C. Reichardt, *Angew. Chem., Int. Ed.*, **1965**, **4**, 29–40.
27. P. Huang, X. Liu, Y. Wada, K. Kato, M. Arai and M. Tamura, *Fuel*, **2013**, **105**, 364–367.
28. P. N. Le Pham, V. Gabaudan, A. Boulaoued, G. Åvall, F. Salles, P. Johansson, L. Monconduit and L. Stievano, *Energy Storage Mater.*, **2022**, **45**, 291–300.
29. D. Battisti, G. A. Nazri, B. Klassen and R. Aroca, *J. Phys. Chem.*, **1993**, **97**, 5826–5830.
30. Z. Wang, W. Gao, X. Huang, Y. Mo and L. Chen, *J. Raman Spectrosc.*, **2001**, **32**, 900–905.
31. J. L. Allen, O. Borodin, D. M. Seo and W. A. Henderson, *J. Power Sources*, **2014**, **267**, 821–830.
32. Y.-S. Kim and S.-K. Jeong, *J. Spectrosc.*, **2015**, **2015**, 323649.
33. L. Suo, F. Zheng, Y.-S. Hu and L. Chen, *Chin. Phys. B*, **2016**, **25**, 016101.
34. N. Xiao, W. D. McCulloch and Y. Wu, *J. Am. Chem. Soc.*, **2017**, **139**, 9475–9478.
35. P. Zeng, Y. Han, X. Duan, G. Jia, L. Huang and Y. Chen, *Mater. Res. Bull.*, **2017**, **95**, 61–70.
36. J. Ming, Z. Cao, Y. Wu, W. Wahyudi, W. Wang, X. Guo, L. Cavallo, J.-Y. Hwang, A. Shamim, L.-J. Li, Y.-K. Sun and H. N. Alshareef, *ACS Energy Lett.*, **2019**, **4**, 2613–2622.
37. R. Konefał, Z. Morávková, B. Paruzel, V. Patsula, S. Abbrent, K. Szutkowski and S. Jurga, *Polymers*, **2020**, **12**, 1595.
38. M. Martinez-Ibañez, N. Boaretto, L. Meabe, X. Wang, H. Zhu, A. Santiago, O. Zugazua, M. Forsyth, M. Armand and H. Zhang, *Chem. Mater.*, **2022**, **34**, 7493–7502.
39. A. Eshaghi and M. Salehi, *Opt. Quantum Electron.*, **2018**, **50**, 431.
40. S. Li, J.-H. Lee, S. M. Hwang, J.-B. Yoo, H. Kim and Y.-J. Kim, *Energy Storage Mater.*, **2021**, **41**, 466–474.
41. C.-M. Park, J.-H. Kim, H. Kim and H.-J. Sohn, *Chem. Soc. Rev.*, **2010**, **39**, 3115–3141.
42. Q. Su, D. Xie, J. Zhang, G. Du and B. Xu, *ACS Nano*, **2013**, **7**, 9115–9121.
43. Y.-D. Ko, J.-G. Kang, K. J. Choi, J.-G. Park, J.-P. Ahn, K. Y. Chung, K.-W. Nam, W.-S. Yoon and D.-W. Kim, *J. Mater. Chem.*, **2009**, **19**, 1829–1835.
44. M. Akbari Garakani, S. Abouali, J. Cui and J.-K. Kim, *Mater. Chem. Front.*, **2018**, **2**, 1481–1488.
45. S. Liu, J. Xie, Q. Su, G. Du, S. Zhang, G. Cao, T. Zhu and X. Zhao, *Nano Energy*, **2014**, **8**, 84–94.
46. J. Y. Cheong, J. H. Chang, C. Kim, J. Lee, Y.-S. Shim, S. J. Yoo, J. M. Yuk and I.-D. Kim, *ACS Appl. Energy Mater.*, **2019**, **2**, 2004–2012.
47. J. F. S. Fernando, C. Zhang, Konstantin L. Firestein, J. Y. Nerkar and D. V. Golberg, *J. Mater. Chem. A*, **2019**, **7**, 8460–8471.

48. P. G. Bruce, S. A. Freunberger, L. J. Hardwick and J. M. Tarascon, *Nat. Mater.*, 2011, **11**, 19–29.
49. Q. Su, J. Xie, J. Zhang, Y. Zhong, G. Du and B. Xu, *ACS Appl. Mater. Interfaces*, 2014, **6**, 3016–3022.
50. J. Zou, J. Zhao, B. Wang, S. Chen, P. Chen, Q. Ran, L. Li, X. Wang, J. Yao, H. Li, J. Huang, X. Niu and L. Wang, *ACS Appl. Mater. Interfaces*, 2020, **12**, 44850–44857.
51. M. G. Boebinger, M. Xu, X. Ma, H. Chen, R. R. Unocic and M. T. McDowell, *J. Mater. Chem. A*, 2017, **5**, 11701–11709.
52. B. Han, S. Chen, J. Zou, R. Shao, Z. Dou, C. Yang, X. Ma, J. Lu, K. Liu, D. Yu, L. Wang, H. Wang and P. Gao, *Nanoscale*, 2019, **11**, 7474–7480.
53. S. Hwang, Z. Yao, L. Zhang, M. Fu, K. He, L. Mai, C. Wolverton and D. Su, *ACS Nano*, 2018, **12**, 3638–3645.
54. Z. Ma, Z. Yao, Y. Cheng, X. Zhang, B. Guo, Y. Lyu, P. Wang, Q. Li, H. Wang, A. Nie and A. Aspuru-Guzik, *Nano Energy*, 2020, **67**, 104276.
55. Q. Li, P. Du, Y. Yuan, W. Yao, Z. Ma, B. Guo, Y. Lyu, P. Wang, H. Wang, A. Nie, R. Shahbazian-Yassar and J. Lu, *Nano Lett.*, 2019, **19**, 3074–3082.
56. L. Li, F. Meng and S. Jin, *Nano Lett.*, 2012, **12**, 6030–6037.
57. C. Villa, S. Kim, Y. Lu, V. P. Dravid and J. Wu, *ACS Appl. Mater. Interfaces*, 2019, **11**, 647–654.
58. F. Wang, S. W. Kim, D. H. Seo, K. Kang, L. Wang, D. Su, J. J. Vajo, J. Wang and J. Graetz, *Nat. Commun.*, 2015, **6**, 6668.
59. S. Shi, Z. Li, Y. Sun, B. Wang, Q. Liu, Y. Hou, S. Huang, J. Huang and Y. Zhao, *Nano Energy*, 2018, **48**, 510–517.
60. J. Liang, G. Zhu, Y. Zhang, H. Liang and W. Huang, *Nano Res.*, 2021, **15**, 2023–2029.
61. Y. Ding, T. Han, H. Zhang, M. Cheng, Y. Wu, X. Chen, M. Chi, J. Niu and J. Liu, *Appl. Surf. Sci.*, 2019, **490**, 510–515.
62. Wohlfarth, C. *Permittivity (Dielectric Constants) of Liquids*. In *CRC Handbook of Chemistry and Physics* (Internet Version 2015); Haynes, W. M., Ed.; CRC Press/Taylor and Francis: Boca Raton, FL, 2015.
63. Y. Matsuda, H. Nakashima, M. Morita and Y. Takasu, *J. Electrochem. Soc.*, 1981, **128**, 2552–2556.
64. M. Ue and S. Mori, *J. Electrochem. Soc.*, 1995, **142**, 2577–2581.
